# Supplementary material
Source: PubMed Central journal article supplement (PMC10637036)

# Supplementary Figure 1

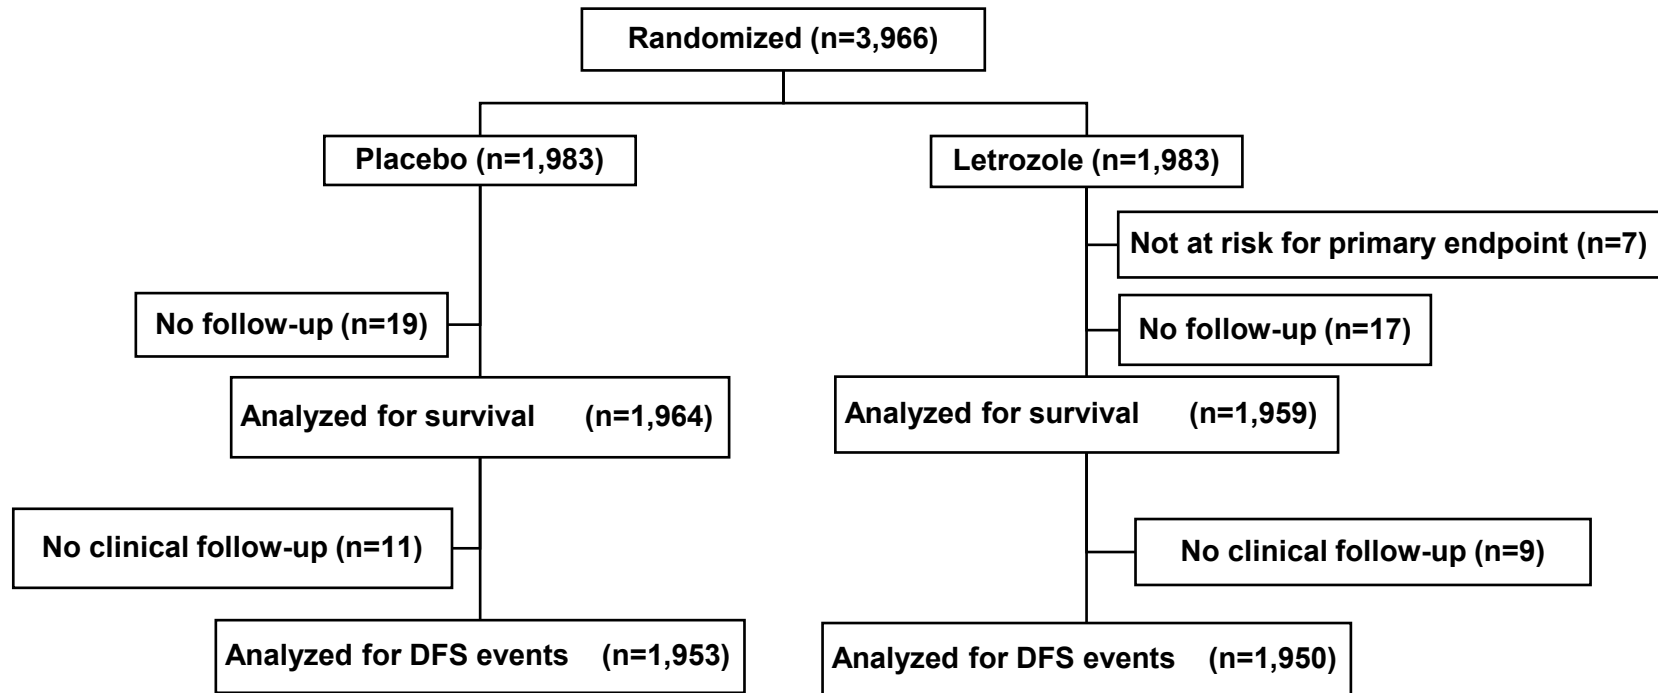

# Supplementary Figure 2

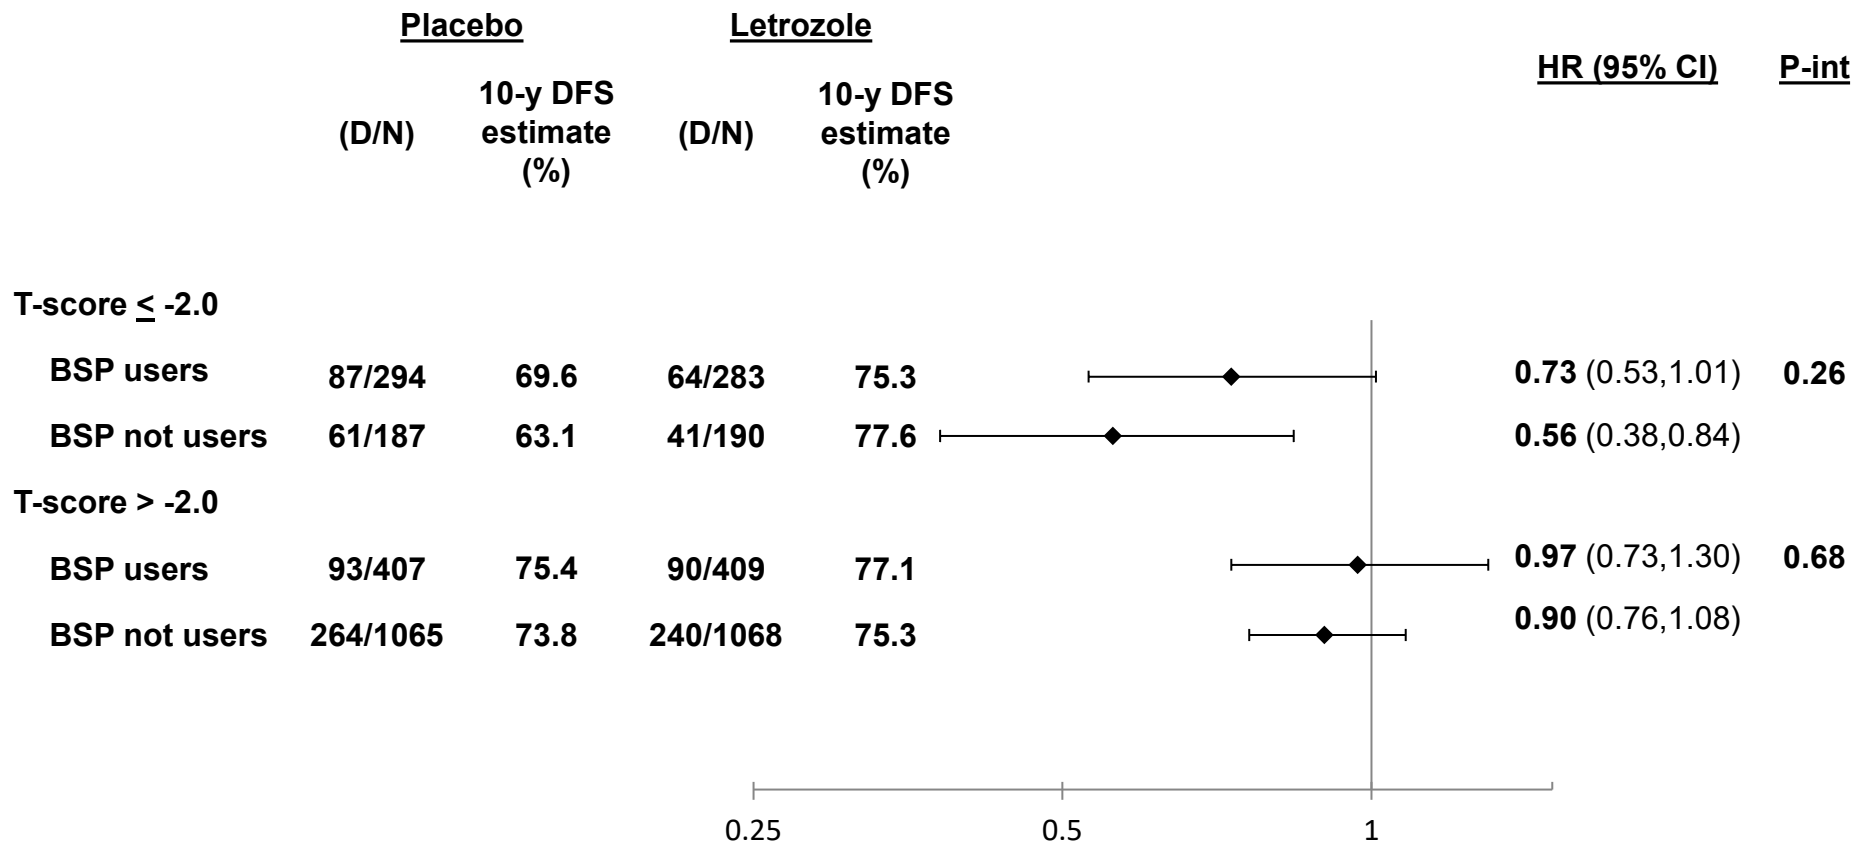

# Supplementary Figure 3

Placebo (# events)    Letrozole (# events)

(N=1953)    (N=1950)

HR for L vs P  
(95% CI)

## DFS

Original 7-year results    339    292    0.85 (0.73, 0.999)

Updated 10-year results    505    435    0.85 (0.74, 0.96)

## OS \*

Original 7-year results    146    164    1.15 (0.92, 1.44)

Updated 10-year results    272    262    0.97 (0.82, 1.15)

## DR

Original 7-year results    102    73    0.72 (0.53, 0.97)

Updated 10-year results    139    101    0.72 (0.55, 0.92)

## BCFI

Original 7-year results    179    127    0.71 (0.56, 0.89)

Updated 10-year results    246    189    0.75 (0.62, 0.91)

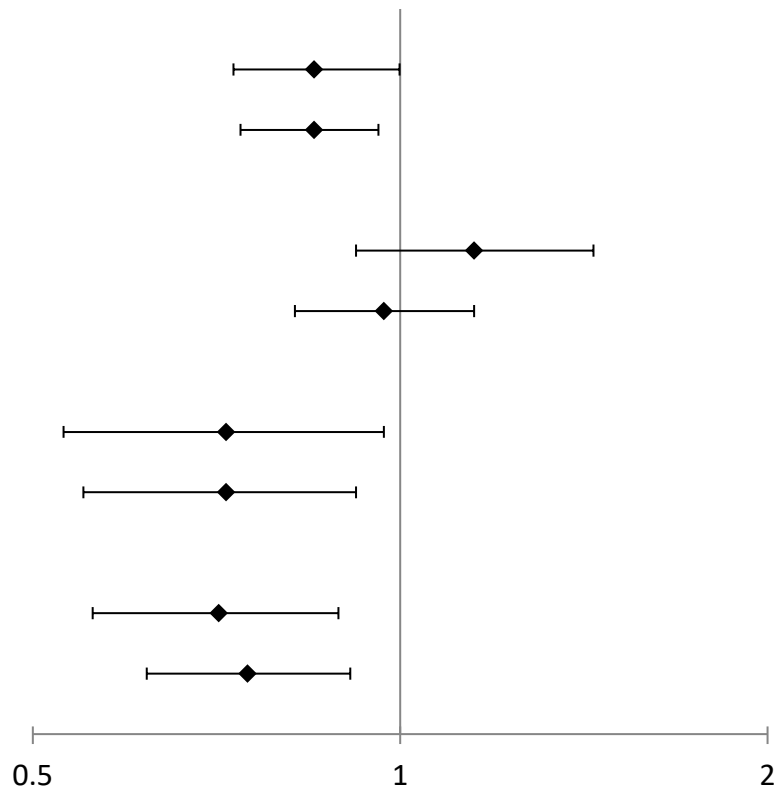

Supplement: djad078_supplementary_data.pdf [file djad078_supplementary_data.pdf]
